# Supplementary material
Source: PubMed Central journal article supplement (PMC4918547)
Supplement: BLT-14-185_SuppTable.pdf [file BLT-14-185_SuppTable.pdf]

Supplementary Table I – Metabolomics report (values for each metabolite are reported as peak areas – arbitrary units)

| N  | compound                        | Compound         | Pathway     | parent   | molRS    | Lymph     |           |           |          |          |          |          |          |           |           | Polarity | Plasma    |           |           |           |           | p-value |
|----|---------------------------------|------------------|-------------|----------|----------|-----------|-----------|-----------|----------|----------|----------|----------|----------|-----------|-----------|----------|-----------|-----------|-----------|-----------|-----------|---------|
|    |                                 |                  |             |          |          | Patron 1  | Patron 2  | Patron 3  | Patron 4 | Patron 5 | Patron 6 | Patron 7 | Patron 8 | Patron 9  | Patron 10 |          | Patron 11 | Patron 12 | Patron 13 | Patron 14 | Patron 15 |         |
| 1  | Alanine                         | C00041           | Amino acids | 90.05566 | 1.174215 | 1.67E-07  | 1.27E-07  | 1.03E-07  | 1.36E-07 | 6924436  | 2.13E-07 | 1.25E-07 | 1.24E-07 | 1.59E-07  | 8993585   | +        | 7.82E-01  | 1.02E-00  | 8.29E-01  | 8.66E-01  | 7.70E-01  | 0.05    |
| 2  | Arginine                        | C00062           | Amino acids | 175.1191 | 1.135574 | 1439308   | 4487429   | 2965745   | 6632798  | 1065597  | 4852439  | 2144264  | 2432830  | 7589962   | 54205.7   | +        | 2.97E-01  | 2.09E-01  | 1.22E-01  | 8.75E-01  | 1.96E-01  | 0.27    |
| 3  | Asparagine                      | C00052           | Amino acids | 133.001  | 1.181709 | 4991.61.3 | 304873.1  | 584691.3  | 927393.8 | 33401    | 648040.2 | 610477.1 | 728990.2 | 1482362   | 383034.2  | +        | 7.61E-01  | 4.99E-01  | 8.03E-01  | 6.26E-01  | 8.74E-01  | 0.05    |
| 4  | Aspartate                       | C00049           | Amino acids | 134.0449 | 1.380647 | 871212.8  | 4655227   | 636245.9  | 2500554  | 1293725  | 388804   | 941600   | 5519255  | 237802.2  | +         | 2.15E-01 | 4.93E-01  | 2.01E-01  | 4.44E-01  | 5.44E-01  | 0.07      |         |
| 5  | Cysteine                        | C00097           | Amino acids | 122.0274 | 1.194338 | 85432.75  | 108290.2  | 111106.8  | 277286.4 | 89563.29 | 146794.7 | 109475.9 | 185782.4 | 175408.8  | 130713.7  | +        | 5.62E-01  | 9.89E-01  | 5.99E-01  | 7.39E-01  | 6.85E-01  | 0.03    |
| 6  | Glutamate                       | C00025           | Amino acids | 148.0005 | 1.185457 | 706234.6  | 1180147   | 511840.0  | 1709957  | 365097.8 | 1026442  | 1635088  | 1501414  | 816703.5  | 256278.1  | +        | 6.88E-01  | 7.22E-01  | 3.41E-01  | 8.71E-01  | 6.57E-01  | 0.06    |
| 7  | Glutamine                       | C00064           | Amino acids | 147.0765 | 1.181116 | 118E-07   | 8647220   | 1.05E-07  | 1.43E-07 | 1.01E-07 | 1.30E-07 | 1.05E-07 | 1.18E-07 | 1.90E-07  | 1.27E-07  | +        | 6.53E-01  | 8.27E-01  | 8.93E-01  | 7.55E-01  | 7.91E-01  | 0.02    |
| 8  | Glycine                         | C00039           | Amino acids | 76.04021 | 1.17444  | 1.01E-07  | 3085.761  | 1.01E-07  | 9374916  | 9297892  | 1.07E-07 | 1.06E-07 | 8866552  | 1.11E-07  | 9820547   | +        | 9.46E-01  | 2.92E-01  | 1.14E-01  | 8.44E-01  | 9.66E-01  | 0.31    |
| 9  | Histidine                       | C00135           | Amino acids | 156.077  | 1.154125 | 3000593   | 1765991   | 2157750   | 3240890  | 2679106  | 2620183  | 2341403  | 2408225  | 3119433   | +         | 1.12E-01 | 5.43E-01  | 8.23E-01  | 8.96E-01  | 1.04E-01  | 0.38      |         |
| 10 | Isotriiodocysteine              | C00407           | Amino acids | 132.102  | 1.214039 | 4.34E-07  | 4.92E-07  | 5.65E-07  | 7.16E-07 | 2.30E-07 | 5.16E-07 | 4.96E-07 | 4.04E-07 | 2.21E-07  | +         | 8.41E-01 | 1.12E-01  | 1.26E-01  | 1.77E-01  | 1.04E-01  | 0.28      |         |
| 11 | Isoleucine                      | C00047           | Amino acids | 147.1128 | 1.001849 | 5796530   | 6379192   | 6345352   | 1.62E-07 | 2846016  | 6032066  | 1.07E-07 | 6943244  | 1.69E-07  | 2666199   | +        | 9.61E-01  | 5.97E-01  | 9.14E-01  | 1.01E-01  | 1.07E-01  | 0.32    |
| 12 | Methionine                      | C00073           | Amino acids | 150.0585 | 1.214039 | 2045257   | 3804873   | 4283982   | 1.13E-07 | 9718915  | 2239859  | 2152992  | 2874340  | 8257055   | 727291.3  | +        | 9.13E-01  | 1.77E-01  | 1.50E-01  | 1.32E-01  | 1.26E-01  | 0.09    |
| 13 | Phenylalanine                   | C00079           | Amino acids | 166.0805 | 1.210995 | 2144868   | 4201.413  | 2277500   | 2796684  | 1241681  | 1500599  | 2072548  | 2196579  | 2526657   | 1664685   | +        | 1.43E-01  | 2.03E-01  | 1.04E-01  | 1.11E-01  | 7.49E-01  | 0.28    |
| 14 | Proline                         | C00148           | Amino acids | 116.071  | 1.199462 | 5.76E-07  | 4.68E-07  | 3.14E-07  | 7.60E-07 | 2.04E-07 | 5.33E-07 | 2.74E-07 | 2.45E-07 | 5.07E-07  | 1.85E-07  | +        | 1.09E-01  | 1.71E-01  | 1.28E-01  | 1.50E-01  | 1.31E-01  | 0.05    |
| 15 | Serine                          | C00065           | Amino acids | 106.0504 | 1.179736 | 32719.8   | 281160.7  | 480118.2  | 73292.1  | 165123.7 | 425273.1 | 576715   | 596349.3 | 1278051   | 491712.5  | +        | 7.70E-01  | 4.88E-01  | 8.05E-01  | 5.73E-01  | 8.61E-01  | 0.08    |
| 16 | Threonine                       | C00188           | Amino acids | 120.0699 | 1.1823   | 1790000   | 3011191   | 2116378   | 6276048  | 632873.4 | 2489999  | 3892522  | 2378773  | 7684470   | 719041.2  | +        | 7.19E-01  | 8.36E-01  | 8.93E-01  | 8.17E-01  | 8.80E-01  | 0.06    |
| 17 | Tryptophan                      | C00078C0025C0086 | Amino acids | 208.0973 | 1.216601 | 158711.6  | 1215978   | 915324.8  | 1382621  | 33421.05 | 0        | 672382.8 | 948476.5 | 1407000   | +         | 4.75E-01 | 8D9V0     | 1.08E-01  | 9.65E-01  | 8.93E-01  | 0.32      |         |
| 18 | Tyrosine                        | C00082           | Amino acids | 182.0813 | 1.213843 | 8298726   | 6881450   | 1.18E-07  | 9758917  | 489428   | 7818154  | 5748086  | 6197974  | 9034245   | 4896336   | +        | 1.06E-01  | 1.20E-01  | 1.23E-01  | 1.08E-01  | 1.00E-01  | 0.07    |
| 19 | Valine                          | C00183           | Amino acids | 118.0806 | 1.204386 | 5.11E-07  | 6.91E-07  | 6.95E-07  | 1.04E-07 | 4.79E-07 | 5.98E-07 | 8.08E-07 | 4.90E-07 | 6.78E-07  | 3.47E-07  | +        | 8.57E-01  | 1.34E-01  | 1.42E-01  | 1.54E-01  | 1.38E-01  | 0.09    |
| 20 | Cysteine                        | C00491           | Amino acids | 241.0312 | 1.184475 | 155177.8  | 7814324   | 5259939.4 | 542476   | 45385.81 | 70180.52 | 8601.863 | 4702866  | 1011080   | 24959.13  | +        | 2.19E-01  | 2.19E-01  | 1.12E-01  | 5.26E-01  | 1.82E-01  | 0.34    |
| 21 | Hypoxanthine                    | C00302           | Nucleotides | 135.029  | 1.234113 | 2047975   | 1556036   | 1556938   | 778279.8 | 3015407  | 2173709  | 1913492  | 2217339  | 1020967   | 3271338   | -        | 9.42E-01  | 8.13E-01  | 7.02E-01  | 7.62E-01  | 9.21E-01  | 0.02    |
| 22 | Xanthine                        | C00385           | Nucleotides | 155.0392 | 1.088866 | 117698    | 91872.32  | 809900.4  | 158853.5 | 184900.5 | 105084.8 | 125457.3 | 181563.8 | 495857.2  | 85306.29  | +        | 1.12E-01  | 7.32E-01  | 2.10E-01  | 3.20E-01  | 2.17E-01  | 0.90    |
| 23 | Guanine                         | C00242           | Nucleotides | 152.0545 | 1.231964 | 101275.2  | 148906.1  | 379077.1  | 448556.6 | 8932.55  | 85997.3  | 71787.1  | 141667.9 | 401274    | 12630.13  | +        | 1.18E-01  | 2.06E-01  | 2.68E-01  | 1.12E-01  | 7.07E-01  | 0.85    |
| 24 | Allantoin                       | C00499           | Nucleotides | 177.0609 | 1.14664  | 107723.6  | 203890.05 | 9873994   | 133634.8 | 17541.15 | 372013.9 | 528419.6 | 412231.1 | 387748.2  | 73827.34  | +        | 2.89E-01  | 8.33E-02  | 2.40E-01  | 2.58E-01  | 2.38E-01  | 0.02    |
| 25 | 5-(γ-Allyl) -Adenon             | C00250           | Nucleotides | 159.0435 | 1.063995 | 1243481   | 41395469  | 2051631   | 5961871  | 180561   | 8194048  | 6283183  | 3801338  | 56195.75  | 45330.19  | +        | 1.74E-01  | 6.54E-01  | 6.64E-01  | 1.07E-01  | 3.98E-01  | 0.21    |
| 26 | 5-Hydroxynorvanone              | C11821           | Nucleotides | 185.0322 | 1.195729 | 1264753   | 2662575   | 1548264   | 3504855  | 1549618  | 783002.2 | 680544.1 | 720024.7 | 4303571.2 | 843371.2  | +        | 1.62E-01  | 3.91E-01  | 2.15E-01  | 3.77E-01  | 1.84E-01  | 0.03    |
| 27 | 3-Phosphoacyl-N-formylglycinate | C04376           | Nucleotides | 313.068  | 1.302738 | 4.64E-07  | 2.09E-07  | 4.44E-07  | 3.32E-07 | 4.29E-07 | 3.30E-07 | 3.51E-07 | 3.76E-07 | 3.61E-07  | 3.50E-07  | +        | 1.40E-01  | 5.97E-01  | 1.19E-01  | 8.89E-01  | 1.23E-01  | 0.70    |
| 28 | UMP                             | C00105           | Nucleotides | 323.0607 | 1.223435 | 27684.57  | 38225.51  | 3601606   | 19379.37 | 26525.02 | 3829403  | 43161.7  | 71481.61 | 18424.45  | 150870.4  | -        | 7.23E-01  | 8.86E-01  | 5.94E-01  | 1.05E-01  | 1.76E-01  | 0.21    |
| 29 | Cytidine                        | C00475           | Nucleotides | 244.0813 | 1.199085 | 839574    | 67674.69  | 1008935   | 231927.9 | 803747.9 | 775001.5 | 952984.8 | 1563855  | 175425.5  | 1759230   | +        | 1.08E-01  | 1.14E-01  | 6.84E-01  | 3.20E-01  | 4.57E-01  | 0.04    |
| 30 | 5-6-Dihydrothymine              | C00066           | Nucleotides | 129.0699 | 1.217231 | 7647330   | 528661.2  | 5317876   | 9103401  | 2.04E-07 | 7090320  | 3615075  | 5097120  | 6891686   | 1.26E-07  | +        | 1.08E-01  | 1.44E-01  | 1.64E-01  | 1.32E-01  | 1.62E-01  | 0.14    |
| 31 | Thymine                         | C00178           | Nucleotides | 125.0344 | 1.209983 | 1628916   | 1999810   | 1766629   | 1559129  | 1684812  | 1642146  | 1743664  | 1728031  | 1754434   | 1707941   | -        | 9.92E-01  | 1.15E-01  | 1.02E-01  | 8.89E-01  | 9.66E-01  | 0.94    |
| 32 | 1-5-Cyclic IMP                  | C00943           | Nucleotides | 329.0365 | 1.301481 | 5846988   | 2.11E-07  | 1.13E-07  | 1.35E-07 | 1.10E-07 | 212125   | 4233574  | 264338   | 1166018   | 3095623   | +        | 2.76E-01  | 5.47E-01  | 4.29E-01  | 4.29E-01  | 3.55E-01  | 0.02    |
| 33 | Pyridoxal                       | C00250           | Nucleotides | 168.0634 | 1.157317 | 141396.9  | 29385.24  | 9202798   | 7377822  | 97968.16 | 172724.4 | 146870   | 1688204  | 146481.1  | 179646.8  | +        | 8.19E-01  | 2.06E-01  | 4.93E-01  | 5.01E-01  | 5.45E-01  | 0.00    |
| 34 | Pyridoxamine phosphate          | C00447           | Nucleotides | 247.0545 | 1.244654 | 116852.1  | 2146511   | 70398.96  | 202998.9 | 1382907  | 88279.1  | 2820797  | 139634.7 | 104467.7  | 172458.2  | -        | 1.32E-01  | 7.61E-01  | 5.04E-01  | 1.94E-01  | 8.02E-01  | 0.40    |
| 35 | Nicotinamide                    | C00153           | Nucleotides | 123.0526 | 1.085965 | 1662857   | 784842.3  | 1138564   | 847815.1 | 1127221  | 2384952  | 1630741  | 1821423  | 2094975   | 1706436   | +        | 6.97E-01  | 4.81E-01  | 6.24E-01  | 4.14E-01  | 6.61E-01  | 0.00    |
| 36 | Adenosine                       | C00212           | Nucleotides | 266.0576 | 1.207538 | 9177032   | 44801.99  | 91778.35  | 5445404  | 89960.34 | 82567.33 | 89138.59 | 9801104  | 78665.02  | 94489.06  | +        | 1.10E-01  | 5.08E-01  | 9.36E-01  | 7.08E-01  | 9.43E-01  | 0.20    |
| 37 | Guanosine                       | C00387           | Nucleotides | 282.0782 | 1.212839 | 74935.27  | 87138.97  | 37675.5   | 3949492  | 581997.2 | 124748.2 | 50270.54 | 48001.88 | 43138.81  | 36486.65  | -        | 6.01E-01  | 7.39E-01  | 7.83E-01  | 9.24E-01  | 1.66E-01  | 0.39    |
| 38 | Inosine                         | C00294           | Nucleotides | 269.114  | 1.241479 | 92398.6   | 373099.2  | 44425.05  | 256736.9 | 27599.9  | 179401.5 | 251813   | 90971.41 | 197151.8  | 213105.3  | +        | 1.07E-01  | 1.48E-01  | 4.88E-01  | 1.50E-01  | 1.29E-01  | 0.21    |
| 39 | Uridyl                          | C00106           | Nucleotides | 1133.036 | 1.088232 | 56543.5   | 253648.7  | 411986.6  | 231221.3 | 367418.9 | 1011599  | 696457.3 | 6738227  | 771751.7  | 686295.6  | +        | 5.54E-01  | 3.64E-01  | 6.11E-01  | 3.00E-01  | 5.35E-01  | 0.00    |
| 40 | NAD <sup>+</sup>                | C00003           | Nucleotides | 664.8801 | 1.136041 | 26658.91  | 179755.6  | 54911.57  | 29373.8  | 63210.49 | 74148.66 | 29940.76 | 46559.22 | 25745.9   | 21611.87  | +        | 1.60E-01  | 6.04E-01  | 1.18E-01  | 1.14E-01  | 2.92E-01  | 0.40    |
| 41 | NADH                            | C00004           | Nucleotides | 665.9266 | 1.144549 | 91363.16  | 60201.44  | 7132.955  | 26736.69 | 7811.045 | 31428.9  | 62849.48 | 33568.84 | 152075.2  | 160297.6  | +        | 2.91E-01  | 9.58E-01  | 3.03E-02  | 1.75E-01  | 4.87E-02  | 0.02    |
| 42 | Uridyl                          | C15587           | Nucleotides | 1        |          |           |           |           |          |          |          |          |          |           |           |          |           |           |           |           |           |         |

|     |                                         |        |                                               |          |         |          |          |          |           |          |          |          |          |          |          |          |          |          |          |          |          |      |
|-----|-----------------------------------------|--------|-----------------------------------------------|----------|---------|----------|----------|----------|-----------|----------|----------|----------|----------|----------|----------|----------|----------|----------|----------|----------|----------|------|
| 52  | Lactose                                 | C00432 | Chitin                                        | 850279   | 144967  | 4378-07  | 2368-07  | 1360-07  | 1638-07   | 3448-07  | 4556-07  | 4078-07  | 979181   | 3598-07  |          | 7.88E-01 | 5.55E-01 | 5.30E-01 | 1.04E-01 | 9.00E-01 | 0.06     |      |
| 53  | Mannose                                 | C00435 | Other sugars                                  | 503766   | 125263  | 36729    | 0        | 0        | 0         | 16114.08 | 322274   | 266742   | 306164   | 10847.7  | 48902    | 1.05E+01 | 0.00E+00 | 0.00E+00 | 0.00E+00 | 1.67E+02 | 0.03     |      |
| 54  | Mannitol                                | C00502 | Other sugars                                  | 1610717  | 121343  | 62389.8  | 379762   | 360726   | 556573    | 498357   | 101380   | 108268   | 91766.78 | 101733   | 48158.1  | 5.99E+01 | 5.27E-01 | 5.53E-01 | 5.48E-01 | 1.07E+01 | 0.26     |      |
| 55  | D-Ribose                                | C00421 | Other sugars                                  | 1490454  | 1244584 | 25064.4  | 35791.2  | 28352.5  | 21994.1   | 65116.8  | 36367    | 66974.6  | 34259.7  | 38580.3  | 1029164  | 1.46E+01 | 5.30E-01 | 8.21E-01 | 5.67E-01 | 6.33E-01 | 0.19     |      |
| 56  | Dulcitol                                | C00504 | Other sugars                                  | 1510415  | 1402559 | 195438.4 | 123882.6 | 165148.7 | 161026    | 139891.2 | 31864.2  | 31808    | 219907   | 24892.1  | 28148.2  | 9.15E+01 | 5.90E-01 | 7.44E-01 | 6.72E-01 | 5.54E-01 | 0.02     |      |
| 57  | cis-Aconitate                           | C00347 | TCA cycle                                     | 1730707  | 1346107 | 2639573  | 126478   | 2008802  | 86610.8   | 2753702  | 1258309  | 2296562  | 106820   |          |          | 9.95E+01 | 1.06E+01 | 1.90E+01 | 3.16E+01 | 1.55E+01 | 0.29     |      |
| 58  | Citrate                                 | C00158 | TCA cycle                                     | 1911093  | 1245629 | 5476-07  | 4250-07  | 4776-07  | 1588-07   | 4726-07  | 7376-07  | 8376-07  | 3326-07  | 8279808  | 2.83E+07 | 7.46E+01 | 1.51E+01 | 1.44E+01 | 1.91E+01 | 1.66E+01 | 0.33     |      |
| 59  | 2-Oxoglutarate                          | C00326 | TCA cycle                                     | 1450146  | 1235909 | 1616441  | 217847   | 432632.5 | 339921.2  | 1346432  | 2809334  | 1784660  | 598204.8 | 468897.1 | 984917.7 | 8.04E+01 | 1.21E+01 | 7.23E-01 | 7.20E-01 | 1.37E+01 | 0.95     |      |
| 60  | 2-Oxoglutarate                          | C00940 | TCA cycle                                     | 1440291  | 1233965 | 972329.3 | 1099568  | 1131028  | 1080214   | 1093564  | 1204731  | 1190643  | 975148.2 | 1167851  | 1244993  | 8.07E+01 | 8.90E-01 | 1.16E+01 | 9.25E-01 | 8.78E-01 | 0.25     |      |
| 61  | Succinate                               | C00342 | TCA cycle                                     | 1171079  | 121385  | 525172.8 | 503028.2 | 856904.6 | 412148.9  | 686670.2 | 490127.3 | 86690.4  | 704024.9 | 455800.4 | 825624.9 | 1.05E+01 | 1.03E+01 | 9.23E-01 | 9.05E-01 | 8.32E-01 | 0.28     |      |
| 62  | Malate                                  | C00352 | TCA cycle                                     | 1154023  | 1219147 | 317931.8 | 421451.6 | 290272.7 | 233867.7  | 298844.9 | 288555.8 | 223906.5 | 93041.3  | 220760   | 367029   | 1.10E+01 | 1.88E+01 | 9.40E-01 | 1.04E+01 | 7.90E-01 | 0.56     |      |
| 63  | Malate                                  | C00568 | TCA cycle                                     | 1331029  | 124354  | 4021371  | 4239033  | 1425176  | 1125588   | 2987472  | 3725220  | 2725303  | 1842391  | 1046715  | 3379144  | 1.08E+01 | 8.90E-01 | 7.74E-01 | 1.08E+01 | 8.84E-01 | 0.57     |      |
| 64  | Oxaloacetate                            | C00336 | TCA cycle                                     | 1310001  | 1206466 | 1481656  | 1634643  | 1782871  | 1543490   | 1747285  | 1746462  | 1873337  | 1708952  | 1714211  | 1598771  | 8.51E+01 | 8.72E-01 | 1.03E+01 | 9.00E-01 | 1.10E+01 | 0.32     |      |
| 65  | 2-Hydroxyglutarate                      | C00240 | Aberrant Catabolic cycle                      | 1440291  | 1246079 | 1430670  | 930060.8 | 487045.7 | 329773.6  | 697046.6 | 7709229  | 468140   | 230849   | 1453772  |          | 1.45E+01 | 1.21E+01 | 1.04E+01 | 1.43E+01 | 8.06E-01 | 0.49     |      |
| 66  | 6-Phospho-D-ribosone                    | C00345 | Pentose Phosphate Pathway                     | 2751082  | 1220318 | 899256   | 1736895  | 2757512  | 11911.9   | 44185.39 | 1413816  | 46032.38 | 26536.64 | 38082.62 | 129837.1 | 5.61E+01 | 4.38E-01 | 1.03E+01 | 3.88E+01 | 1.66E+01 | 0.07     |      |
| 67  | D-Glucose 1-6 lactone 6-phosphate       | C00236 | Pentose Phosphate Pathway                     | 3691154  | 1099924 | 20086.69 | 23780.91 | 20086.69 | 23780.91  | 20086.69 | 23780.91 | 23780.91 | 20086.69 | 23780.91 | 23780.91 | 9.87E+01 | 7.94E-01 | 5.33E-01 | 8.39E-01 | 9.76E-01 | 0.11     |      |
| 68  | D-Erythrose 4-phosphate                 | C00279 | Pentose Phosphate Pathway                     | 1983974  | 1108733 | 127781.6 | 57439.84 | 106121.9 | 10639.8   | 10639.8  | 128545.1 | 12900.7  | 12357.6  | 116179.9 | 12584.1  | 9.94E+01 | 4.66E-01 | 8.60E-01 | 8.68E-01 | 8.62E-01 | 0.11     |      |
| 69  | alpha-D-Ribose 4-phosphate              | C00620 | Pentose Phosphate Pathway                     | 2291007  | 1203389 | 37117.4  | 136665.5 | 46502.6  | 20863.9   | 460037.1 | 263603.5 | 2208.31  | 86647.5  | 223779.9 | 65308.1  | 1.28E+01 | 7.19E-01 | 9.39E-01 | 9.32E-01 | 7.04E-01 | 0.37     |      |
| 70  | 5-Phospho-alpha-D-ribose 1-diphosphate  | C00119 | Pentose Phosphate Pathway                     | 476942.8 | 1277131 | 9088105  | 977233.8 | 562491.9 | 2170917.3 | 314491.3 | 219262.3 | 257343.6 | 267030.5 |          |          | 2.20E+01 | 9.32E+01 | 2.53E+01 | 1.64E+01 | 2.11E+01 | 0.21     |      |
| 71  | Gluconate                               | C00391 | GSH biosynthesis                              | 3060788  | 1232992 | 466125   | 370143.9 | 0        | 0         | 8297148  | 4742450  | 42822.81 | 0        | 23839.1  |          | 5.62E+01 | 8.09E-01 | 0.00E+00 | #DIV/0!  | 0.00E+00 | 0.26     |      |
| 72  | 5-Oxoproline                            | C00379 | GSH biosynthesis                              | 128014   | 1244585 | 1425591  | 1901302  | 1273458  | 890199.1  | 1109956  | 2518149  | 472566   | 2258167  | 1501914  | 1975566  | 5.66E+01 | 4.56E-01 | 5.64E-01 | 5.96E-01 | 5.61E-01 | 0.02     |      |
| 73  | S-Glutathionyl-L-cystine                | C00526 | GSH biosynthesis                              | 4270943  | 1209866 | 2126265  | 0        | 28353.1  | 9302660   | 1876361  | 6836414  | 608479   | 784192   | 6498168  | 3122616  | 3.11E+01 | 0.00E+00 | 3.00E+01 | 1.43E+01 | 5.89E-01 | 0.22     |      |
| 74  | Acetone                                 | C00372 | GSH biosynthesis                              | 1750243  | 1212841 | 1183304  | 683393.5 | 1647487  | 802665.5  | 1538382  | 936664.5 | 777327   | 2802777  | 6012619  | 3474922  | 1.31E+01 | 8.80E-01 | 5.70E-01 | 1.20E+01 | 4.43E-01 | 0.26     |      |
| 75  | Dihydroxyacetone                        | C00322 | GSH biosynthesis                              | 1731003  | 124878  | 2688873  | 1348107  | 2688873  | 860113.3  | 104356   | 2218102  | 1250309  | 1069662  | 247488.8 | 1056920  | 9.95E+01 | 1.06E+01 | 1.99E+01 | 3.34E+01 | 1.55E+01 | 0.29     |      |
| 76  | gamma-Glutamyl-L-serine methylethionine | C00605 | Gamma-glutamyl                                | 3110353  | 1152704 | 8801156  | 0        | 33815.87 | 2120674   | 0        | 185092.4 | 2301628  | 17871.7  | 181724   | 2838592  | 3.13E+01 | 0.00E+00 | 1.97E-01 | 1.17E-01 | 0.00E+00 | 0.01     |      |
| 77  | gamma-L-Glutamyl-D-alanine              | C00738 | Gamma-glutamyl                                | 2194973  | 1237314 | 305408.9 | 1831172  | 214550.2 | 540957.6  | 87121    | 195108   | 185764.5 | 143840.2 | 1232401  | 159885.2 | 1.57E+01 | 9.66E+01 | 1.49E+01 | 4.36E+01 | 2.57E+01 | 0.17     |      |
| 78  | Bis-gamma-glutamyl-L-cysteine           | C00446 | Gamma-glutamyl                                | 4974674  | 1248631 | 176768.9 | 134212.7 | 79547.63 | 2517712   | 122887.6 | 42944.79 | 122967   | 2435417  | 8489407  | 1013701  | 4.12E+01 | 1.07E+01 | 3.27E+01 | 2.97E-01 | 1.21E+01 | 0.37     |      |
| 79  | (S)-Gamma-L-glutamine                   | C00283 | Gamma-glutamyl                                | 276118   | 1223629 | 210557.4 | 209587   | 249541.2 | 249541.2  | 398387.5 | 287941.6 | 906307   | 249914.4 | 3711107  |          | 5.29E+01 | 7.28E-01 | 9.96E-01 | 9.63E-01 | 7.07E-01 | 0.09     |      |
| 80  | S-L-Glutamyl-uracine                    | C00844 | Gamma-glutamyl                                | 2533573  | 1210748 | 162292.9 | 201385.2 | 161166.3 | 185904    | 208954.8 | 210158.6 | 175164.6 | 198972.9 | 177461.1 | 167990.9 | 7.72E+01 | 1.15E+01 | 8.10E-01 | 1.04E+01 | 1.24E+01 | 0.91     |      |
| 81  | gamma-L-Glutamyl-[acp]                  | C18006 | Gamma-glutamyl                                | 1611015  | 1227993 | 1396445  | 1531245  | 1296971  | 1538923   | 1576762  | 1699282  | 1624656  | 1497544  | 1645414  | 1571508  | 8.21E+01 | 9.41E-01 | 8.14E-01 | 9.30E-01 | 1.00E+01 | 0.06     |      |
| 82  | L-Homocysteine                          | C00155 | Serine biosynthesis and one-carbon metabolism | 1361047  | 1241479 | 9221605  | 2950115  | 50922    | 6621309   | 913462   | 9936974  | 1268155  | 895533   | 3285591  | 101124.2 | 9.28E+01 | 9.22E-01 | 1.02E+01 | 7.41E-01 | 9.02E-01 | 0.12     |      |
| 83  | Cysteine                                | C00342 | Serine biosynthesis and one-carbon metabolism | 3678974  | 1161621 | 6738974  | 7724969  | 5936725  | 5837761   | 4579015  | 136849   | 178027   | 3268534  | 6446257  |          | 2.09E+01 | 4.34E+01 | 3.50E+01 | 1.80E+01 | 7.10E+01 | 0.00     |      |
| 84  | N,N-Dimethylglycine                     | C00206 | Serine biosynthesis and one-carbon metabolism | 104071   | 1228899 | 184898   | 333392   | 2790037  | 3081004   | 1292275  | 1766126  | 2406485  | 2911738  | 2173073  | 1154475  | 1.06E+01 | 1.34E+01 | 1.07E+01 | 1.42E+01 | 1.12E+01 | 0.08     |      |
| 85  | D-3-Phosphoglycerate                    | C00252 | Serine biosynthesis and one-carbon metabolism | 1801084  | 1089074 | 448008   | 830991.9 | 378987.4 | 2514027   | 321944.8 | 633480.2 | 438977.8 | 53225.1  | 498098.6 | 831117.2 | 7.01E+01 | 7.03E-01 | 7.08E-01 | 5.12E-01 | 6.10E-01 | 0.00     |      |
| 86  | L-Phosphoenolpyruvate                   | C00252 | Serine biosynthesis and one-carbon metabolism | 1829767  | 1159994 | 9152132  | 2370392  | 64398.34 | 5187282   | 7413519  | 9488085  | 875961   | 6371103  | 8191245  | 7666013  | 9.65E+01 | 2.71E-01 | 9.85E-01 | 6.33E-01 | 9.67E-01 | 0.17     |      |
| 87  | S-Adenosyl-L-homocysteine               | C00021 | Serine biosynthesis and one-carbon metabolism | 3851282  | 1200717 | 176559.4 | 0        | 59011    | 0         | 89328.52 | 293661.8 | 36089.49 | 99961.22 | 41109.07 | 14748.3  | 6.01E+01 | 0.00E+00 | 6.15E-01 | 0.00E+00 | 6.30E-01 | 0.03     |      |
| 88  | S-Adenosyl-L-methionine                 | C00019 | Serine biosynthesis and one-carbon metabolism | 3990978  | 1195889 | 8105308  | 5754314  | 218922.3 | 6834712   | 229171.1 | 1330977  | 53201.5  | 62391.84 | 28802.99 | 86503.05 | 6.14E+01 | 1.06E+01 | 3.51E+01 | 2.40E+01 | 2.65E+01 | 0.12     |      |
| 89  | Folate                                  | C00304 | Folate pool (One carbon metabolism)           | 4421078  | 125548  | 6665084  | 0        | 0        | 0         | 0        | 32207.38 | 1761021  | 4535312  | 5153310  | 7716482  | 2.07E+01 | 0.00E+00 | 0.00E+00 | 0.00E+00 | 0.00E+00 | 0.17     |      |
| 90  | 5,10-Methylenetetrahydrofolate          | C00445 | Folate pool (One carbon metabolism)           | 4531341  | 7415192 | 0        | 2204167  | 6535065  | 0         | 0        | 0        | 1161918  | 2031841  | 0        | 0        | #DIV/0!  | 1.89E+01 | 3.21E-01 | #DIV/0!  | #DIV/0!  | 0.87     |      |
| 91  | 10-Formyltetrahydrofolate               | C00204 | Folate pool (One carbon metabolism)           | 4701531  | 669880  | 1425984  | 5599406  | 2965633  | 3225109   | 1142166  | 2035588  | 1419433  | 1716511  | 3121549  | 1016178  | 7.04E+01 | 3.94E-01 | 1.09E+01 | 1.03E+01 | 1.12E+01 | 0.31     |      |
| 92  | Tetrahydrofolate                        | C00101 | Folate pool (One carbon metabolism)           | 4441602  | 8148584 | 7539482  | 1192131  | 1694401  | 7481277   | 83181.45 | 118048   | 299984   | 1271184  | 5797051  | 1792428  | 6.38E+01 | 6.03E-01 | 1.33E+01 | 1.29E+01 | 6.04E-01 | 0.35     |      |
| 93  | 10-Formyltetrahydrofolate               | C00204 | Folate pool (One carbon metabolism)           | 4721603  | 7420789 | 0        | 1416107  | 3241374  | 1128.8    | 0        | 0        | 1468107  | 892158   | 891280   | 0        | #DIV/0!  | 1.01E+01 | 1.64E+01 | 1.27E+01 | #DIV/0!  | 0.37     |      |
| 94  | Dihydrofolate                           | C00415 | Folate pool (One carbon metabolism)           | 442144   | 7078418 | 1086094  | 0        | 1675634  | 1729733   | 176092   | 589746   | 2726301  | 2490332  | 1152136  | 191693.8 | 1.85E+01 | 0.00E+00 | 6.73E-01 | 1.50E+01 | 9.21E-01 | 0.22     |      |
| 95  | Oxalate                                 | C00602 | Urea cycle                                    | 1331072  | 1049387 | 0        | 987752.2 | 1588215  | 234707    | 1112952  | 1590704  | 1279314  | 2232899  | 2421326  | 1115727  | 0        | 0.00E+00 | 3.62E-01 | 7.11E-01 | 9.68E-01 | 9.98E-01 | 0.10 |
| 96  | L-Citrulline                            | C00327 | Urea cycle                                    | 1761028  | 1200112 | 799552.9 | 223577.6 | 521808.2 | 589526.1  | 205402.2 | 715522.4 | 253495.8 | 666402.8 | 604075.1 | 340368.2 | 1.12E+01 | 8.82E-01 | 7.83E-01 | 9.75E-01 | 8.55E-01 | 0.48     |      |
| 97  | N-L-Argininosuccinate                   | C00486 | Urea cycle                                    | 289071   | 1235157 | 419111.1 | 7561230  | 1626045  | 5044310   | 3309282  | 359607.3 | 4455869  | 340878   | 246631.1 | 347842.5 | 1.19E+01 | 1.70E+01 | 4.77E+01 | 2.05E-01 | 1.33E-01 | 0.06     |      |
| 98  | Urea                                    | C00366 | Urea cycle                                    | 1690367  | 1241479 | 7000794  | 1504190  | 2764293  | 2238922   | 4140250  | 8062056  | 5561636  | 4632122  | 686092   | 8357886  | 8.68E+01 | 2.79E-01 | 5.97E-01 | 5.20E-01 | 4.95E-01 | 0.01     |      |
| 99  | Cadaverine                              | C00256 | Polyamines                                    | 1031234  | 1409553 | 5207511  | 7575218  | 9507773  | 5620625   | 6238613  | 2188556  | 11999.2  | 4855274  | 8253104  |          | 2.38E+01 | 6.31E+01 | 4.22E+01 | 7.34E+01 | 7.55E+01 | 0.13     |      |
| 100 | Spermidine                              | C00315 | Polyamines                                    | 1461     |         |          |          |          |           |          |          |          |          |          |          |          |          |          |          |          |          |      |

Table with columns for compound name, ID, CAS, and various numerical values. The table lists various amino acids and related compounds such as Arginine, Glycine, Proline, and various fatty acids. Each row contains a unique ID and associated numerical data points.



|    |                                                                                        |             |                      |          |          |           |          |           |          |          |           |          |          |          |           |          |   |          |          |          |          |          |          |      |
|----|----------------------------------------------------------------------------------------|-------------|----------------------|----------|----------|-----------|----------|-----------|----------|----------|-----------|----------|----------|----------|-----------|----------|---|----------|----------|----------|----------|----------|----------|------|
| 21 | 2-(5Z, 8Z, 11Z, 14Z-ekosastenoin)-3-octadecanoyl-sn-glycero-1-phosphatidylcholine      | LMGP0201019 | Phosphoethanolamines | 766.5449 | 12.02365 | 166909.1  | 104644.1 | 104123.6  | 89957.48 | 42790.96 | 23392.53  | 2797.16  | 2781.14  | 2250.66  | 9891.53   | -        | - | 7.14E+01 | 3.76E+00 | 3.74E+00 | 2.64E+00 | 4.37E+00 | 0.02     |      |
| 21 | 2-(5Z, 8Z, 11Z, 14Z-ekosastenoin)-3-oxo-1-phenylethyl-sn-glycero-3-phosphoethanolamine | LMGP0201008 | Phosphoethanolamines | 942.7707 | 1.154762 | 26799.8   | 10720.1  | 453487.5  | 510755.6 | 401937.5 | 115496    | 27484    | 11864.5  | 82902.01 | 131102.5  | -        | - | 7.28E+00 | 3.95E+01 | 3.44E+00 | 6.14E+00 | 3.07E+00 | 0.12     |      |
| 21 | 2-(5Z, 8Z, 11Z, 14Z-ekosastenoin)-3-oxo-1-phenylethyl-sn-glycero-3-phosphoethanolamine | LMGP0201007 | Phosphoethanolamines | 746.5961 | 1.188853 | 69108.62  | 45899.11 | 146073.3  | 676373.5 | 104664.7 | 44719.17  | 89254.1  | 69557.46 | 48765.91 | -         | -        | - | 6.60E+01 | 1.71E+00 | 7.70E+00 | 2.02E+00 | 1.39E+00 | 0.47     |      |
| 22 | 1-oxidodecyl-sn-glycero-3-phosphoethanolamine                                          | LMGP0200003 | Phosphoethanolamines | 466.3088 | 8.390325 | 23883.72  | 14520.2  | 476087.2  | 361016.2 | 32782.2  | 37432.02  | 12644.4  | 516526.6 | 98329.5  | 3174.96   | -        | - | 6.38E+00 | 1.15E+00 | 9.22E+01 | 3.47E+00 | 9.88E+01 | 0.48     |      |
| 22 | 1-oxidodecyl-sn-glycero-3-phosphoethanolamine                                          | LMGP0200002 | Phosphoethanolamines | 480.39   | 9.860208 | 39774.4   | 58732.1  | 799590    | 1586427  | 214023.1 | 641624.1  | 1093561  | 1442374  | 150628.4 | -         | -        | - | 6.20E+00 | 5.91E+01 | 7.60E+01 | 1.39E+00 | 1.42E+01 | 0.63     |      |
| 22 | 1-oxidodecyl-sn-glycero-3-phosphoethanolamine                                          | LMGP0200001 | Phosphoethanolamines | 452.2839 | 9.845593 | 4522839   | 882871.7 | 739300    | 1077541  | 2094663  | 738481.6  | 1023222  | 94073.5  | 77684.4  | 2499952   | 841833.7 | - | -        | 6.68E+01 | 7.88E+00 | 1.39E+00 | 1.09E+00 | 8.73E+01 | 0.85 |
| 22 | 1-oxo-2-octadecanoyl-sn-glycero-3-phosphoethanolamine                                  | LMGP0200004 | Phosphoethanolamines | 478.2945 | 9.840563 | 1119297   | 1054727  | 1226205   | 1187160  | 955418.5 | 1676621   | 1329886  | 1386022  | 1395531  | 1305521   | -        | - | 6.68E+01 | 7.93E+00 | 8.85E+01 | 8.51E+01 | 7.52E+01 | 0.01     |      |
| 22 | 1-(4Z, 8Z, 11Z, 14Z-ekosastenoin)-sn-glycero-3-phosphoethanolamine                     | LMGP0200009 | Phosphoethanolamines | 500.2794 | 9.408232 | 9951606   | 5625000  | 6180990   | 5698942  | 4737022  | 9337683   | 7342248  | 7770500  | 7213776  | 6165656   | -        | - | 6.44E+01 | 7.66E+01 | 7.94E+01 | 7.88E+01 | 7.68E+01 | 0.01     |      |
| 22 | 1-(1Z, 12Z-nonadecadienyl)-sn-glycero-3-phosphoethanolamine                            | LMGP0200001 | Phosphoethanolamines | 476.2791 | 9.426203 | 795423.8  | 79524.2  | 1583991   | 1733948  | 652638   | 1232342   | 1001112  | 1255274  | 1625708  | 81952.4   | -        | - | 6.45E+01 | 7.94E+01 | 1.28E+00 | 1.07E+00 | 3.97E+01 | 0.64     |      |
| 22 | 3-pentadecanoyl-sn-glycero-1-phosphocholine                                            | LMGP0100017 | Phosphocholines      | 480.3105 | 10.66415 | 392734.3  | 435573.9 | 795274.2  | 9754043  | 403624.9 | 524576.8  | 488894   | 477619.8 | 800298.1 | 385289    | -        | - | 7.49E+01 | 8.91E+01 | 1.67E+01 | 1.22E+00 | 1.05E+01 | 0.47     |      |
| 22 | 2-(8-[3]-lipoic acid)-octanoyl-sn-glycero-3-phosphocholine                             | LMGP0100026 | Phosphocholines      | 528.3102 | 9.927987 | 790663.8  | 706146.6 | 724672.3  | 67898.3  | 627627.1 | 1133875   | 969529.8 | 980346.3 | 870279.8 | 893675.1  | -        | - | 6.97E+01 | 7.23E+01 | 7.39E+01 | 7.80E+01 | 7.01E+01 | 0.00     |      |
| 22 | 2-(5Z, 8Z, 11Z, 14Z-ekosastenoin)-sn-glycero-3-phosphocholine                          | LMGP0100021 | Phosphocholines      | 542.3374 | 9.860726 | 654202.9  | 1088208  | 1419035   | 2932075  | 459268.2 | 1136603   | 1885686  | 1945310  | 2170466  | 290520    | -        | - | 5.70E+01 | 5.77E+01 | 7.39E+01 | 1.35E+00 | 1.58E+01 | 0.57     |      |
| 22 | 2-(1Z, 4E-decadienyl)-3-(2E, 4E-decadienyl)-sn-glycero-1-phosphocholine                | LMGP0101005 | Phosphocholines      | 556.3183 | 10.03851 | 607312.7  | 1014531  | 1642650   | 4016411  | 801976.8 | 775604.7  | 1189946  | 8897789  | 3438019  | 256796.6  | -        | - | 7.78E+01 | 8.43E+01 | 8.60E+01 | 1.17E+01 | 3.12E+00 | 0.61     |      |
| 23 | N-butanoyl-1-thiosaccharin lactone                                                     | LMFA0001002 | Phosphatidylserines  | 170.0822 | 6.43643  | 8872334   | 1720957  | 220849.6  | 6372184  | 4352.25  | 38.58.378 | 217457   | 296201.6 | 4756409  | 3543312   | -        | - | 1.09E+00 | 7.94E+01 | 7.64E+01 | 1.34E+00 | 1.27E+00 | 0.30     |      |
| 23 | 1-triacyl-sn-glycero-3-phosphoserine                                                   | LMGP0300005 | Phosphatidylserines  | 454.2077 | 6.50079  | 0         | 8422.621 | 10583.41  | 242800   | 367039.8 | 0         | 8269.867 | 81785.38 | 161300.7 | 293240.4  | -        | - | #DIV/0!  | 1.02E+00 | 1.29E+00 | 1.50E+00 | 1.25E+00 | 0.11     |      |
| 23 | Penicillamin                                                                           | C03422      | Xenobiotics          | 227.1272 | 4.20762  | 5866310   | 2002124  | 2625294   | 2122479  | 16581.07 | 7490960   | 6598118  | 3124741  | 5541843  | 7769112   | -        | - | 7.83E+01 | 3.03E+00 | 6.49E+01 | 5.99E+01 | 1.85E+00 | 0.41     |      |
| 23 | Bilirubin                                                                              | C05060      | Hemolysis markers    | 581.2697 | 8.058911 | 61102.2   | 220515.8 | 799252    | 238956.2 | 167112.5 | 1248748   | 516776.6 | 1560874  | 35294.4  | 1315500.9 | -        | - | 6.70E+01 | 5.12E+00 | 6.73E+01 | 6.73E+01 | 5.90E+01 | 0.12     |      |
| 23 | Bilirubin                                                                              | C04886      | Hemolysis markers    | 583.2629 | 7.699477 | 9046975.6 | 1426932  | 4466598   | 4435.10  | 1053392  | 2477186   | 1172488  | 3523683  | 253908.8 | 913597.3  | -        | - | 1.65E+01 | 1.22E+00 | 1.27E+00 | 1.75E+00 | 1.15E+00 | 0.98     |      |
| 23 | Hemier                                                                                 | C06707      | Hemolysis markers    | 396.229  | 1.28135  | 3268.89   | 32872.48 | 155309.1  | 126959.2 | 24784    | 5804.718  | 0        | 5168.434 | 10642.04 | 7377.848  | -        | - | 5.62E+01 | #DIV/0!  | 3.08E+01 | 1.23E+00 | 3.38E+01 | 0.03     |      |
| 23 | 2-Methylglucosamine                                                                    | C02930      | Other                | 143.0342 | 1.13661  | 153505.5  | 120043.5 | 175817.8  | 120043.5 | 150691.9 | 13547.78  | 221022.6 | 13267.4  | 265338.8 | -         | -        | - | 1.13E+00 | 1.15E+00 | 7.90E+00 | 9.06E+01 | 5.88E+01 | 0.37     |      |
| 23 | 4-Aminobenzoate                                                                        | C03668      | Other                | 138.0538 | 1.223529 | 897412.6  | 89741.6  | 9472.66   | 210257.9 | 3630.30  | 62870.1   | 86036.1  | 238190   | 351726.5 | 329153.2  | -        | - | 9.51E+01 | 4.71E+01 | 3.97E+01 | 5.98E+01 | 1.10E+00 | 0.99     |      |
| 23 | Methylmelanin                                                                          | C06381      | Other                | 133.0722 | 1.22256  | 415422.6  | 4003721  | 426702.4  | 3641401  | 911846.3 | 24413.26  | 2664522  | 321338.8 | 2282793  | 620825    | -        | - | 1.70E+00 | 1.52E+00 | 1.33E+00 | 1.60E+00 | 1.47E+00 | 0.99     |      |
| 23 | 3-Oxobutylate                                                                          | C01990      | Other                | 204.9969 | 1.232083 | 183888.6  | 0        | 18544.82  | 7693.123 | 23013.92 | 216660.2  | 19031.87 | 188990   | 292951.8 | -         | -        | - | 8.49E+01 | 0.00E+00 | 9.84E+02 | 2.77E+02 | 6.92E+02 | 0.02     |      |
| 24 | 2-Deoxy-alpha-D-glucoside                                                              | C03573      | Other                | 164.6089 | 1.080861 | 1686478   | 3790146  | 4357662   | 4814754  | 3488002  | 2196795   | 4676518  | 5126554  | 6510654  | 4223392   | -        | - | 7.68E+01 | 8.11E+01 | 8.50E+01 | 7.40E+01 | 8.21E+01 | 0.03     |      |
| 24 | cis-p-Coumarate                                                                        | C06738      | Other                | 165.0357 | 1.241479 | 1249482   | 961353.7 | 1705386   | 1491816  | 627175.1 | 1120020   | 872803.9 | 1337403  | 1301343  | 685311.9  | -        | - | 1.12E+00 | 1.16E+00 | 1.28E+00 | 1.15E+00 | 9.53E+01 | 0.99     |      |
| 24 | N-Acyl-D-mannosaminolactone                                                            | C03792      | Other                | 395.057  | 1.118801 | 271177.6  | 5031082  | 292491.2  | 72428.62 | 215554.9 | 43048.33  | 201431.3 | 894168.8 | 228388.1 | 524121.9  | -        | - | 6.39E+01 | 2.59E+02 | 6.03E+00 | 3.17E+01 | 4.11E+01 | 0.24     |      |
| 24 | N6-Methyl-L-lysine                                                                     | C02728      | Other                | 159.1128 | 1.378058 | 174405.5  | 891591.5 | 7071403.3 | 1009427  | 726846.5 | 107415.9  | 143191.5 | 124774.2 | 114283.7 | 132091.8  | -        | - | 1.62E+00 | 6.92E+00 | 5.67E+00 | 8.83E+00 | 5.52E+00 | 0.02     |      |
| 24 | Dethiobiotin                                                                           | C01909      | Other                | 215.139  | 1.241489 | 143239.1  | 359381.4 | 53934.61  | 62772.56 | 312305.3 | 72875.88  | 148261.7 | 85325.75 | 43005.61 | 192825.5  | -        | - | 1.97E+00 | 2.42E+00 | 6.32E+01 | 1.46E+00 | 1.62E+00 | 0.14     |      |
| 24 | L-2-Aminoisopane                                                                       | C03956      | Other                | 162.0759 | 1.236296 | 207598.2  | 764990.3 | 424192.4  | 499954.1 | 337087.3 | 161916.7  | 304034.1 | 212960   | 314816   | 234123.1  | -        | - | 1.28E+00 | 2.52E+00 | 2.01E+01 | 1.29E+00 | 1.44E+00 | 0.07     |      |
| 24 | Threonate                                                                              | C01620      | Other                | 317.0456 | 1.237213 | 81699     | 1339973  | 637865.2  | 507917.8 | 460722   | 45696.84  | 1151578  | 2138430  | 1211526  | 1357292   | -        | - | 1.75E+00 | 1.07E+00 | 2.50E+00 | 4.39E+01 | 3.96E+01 | 0.12     |      |
| 24 | Tripeptide                                                                             | C03316      | Other                | 187.0564 | 1.075587 | 483191.2  | 1094948  | 1254122   | 1371900  | 830737.7 | 823416.7  | 1528490  | 1455443  | 1829920  | 1607561   | -        | - | 5.86E+01 | 7.23E+01 | 8.62E+01 | 7.53E+01 | 7.78E+01 | 0.00     |      |
| 24 | Catecholamine                                                                          | C03012      | Other                | 152.6097 | 1.204103 | 146833.5  | 829838.2 | 117170.2  | 108520.9 | 133865.9 | 206845.3  | 196609.4 | 21559.8  | 96118.09 | 21195.5   | -        | - | 7.04E+01 | 4.22E+00 | 5.18E+01 | 1.18E+00 | 6.37E+01 | 0.59     |      |
| 24 | Ferri gluconate                                                                        | C13511      | Other                | 196.0583 | 1.152108 | 1323338   | 1429260  | 3431387   | 46222.23 | 8109.001 | 27507.74  | 76852.4  | 34695.82 | 48777.14 | 37164.36  | -        | - | 4.81E+01 | 1.84E+01 | 9.90E+01 | 9.48E+01 | 2.18E+01 | 0.39     |      |
| 25 | Sodium rhubarb                                                                         | C13085      | Other                | 215.0146 | 1.20432  | 1483050   | 753995.6 | 1996821   | 907895.2 | 1717988  | 1070275   | 806237.6 | 2081224  | 881627.7 | 2609376   | -        | - | 1.37E+00 | 8.41E+01 | 9.94E+01 | 1.03E+00 | 6.58E+01 | 0.54     |      |
| 25 | Catechin                                                                               | C17390      | Other                | 289.0866 | 1.238157 | 419111.1  | 7561230  | 1626045   | 5044310  | 3302962  | 359007.3  | 145586.9 | 340878.8 | 246611.1 | 247842.5  | -        | - | 1.19E+00 | 1.70E+00 | 4.77E+00 | 2.05E+01 | 1.33E+01 | 0.06     |      |
| 25 | 6-Thioxanthine 5-monophosphate                                                         | C16618      | Other                | 381.0237 | 1.169113 | 1334001   | 202801.5 | 54645.19  | 146147.9 | 128404   | 73893.64  | 108096.5 | 106473.7 | 94726.12 | 632186    | -        | - | 1.81E+01 | 1.88E+00 | 5.13E+01 | 1.54E+00 | 2.06E+01 | 0.45     |      |
| 25 | Ferri lactate                                                                          | C06229      | Other                | 399.6825 | 1.347247 | 1808734   | 3132074  | 3268370   | 4503598  | 9620677  | 1077829   | 435934   | 1649820  | 2448097  | 5855516   | -        | - | 1.68E+00 | 7.20E+01 | 1.99E+00 | 1.34E+00 | 1.54E+00 | 0.16     |      |
| 25 | Gluconolactone                                                                         | C17260      | Other                | 316.9766 | 1.067667 | 2832988   | 78449.14 | 8313049   | 6229361  | 55108.25 | 26491.79  | 853388   | 7450541  | 9109497  | 77536.66  | -        | - | 1.07E+00 | 9.19E+01 | 1.12E+00 | 6.84E+01 | 7.11E+01 | 0.25     |      |
| 25 | alpha-N-Peptidyl-L-glutamate                                                           | C0904       | Other                | 316.0834 | 1.24252  | 21061.07  | 32121.07 | 33581.07  | 3191E+07 | 412E+07  | 1366E+07  | 137E+07  | 143E+07  | 1338E+07 | 137E+07   | -        | - | 1.54E+00 | 2.35E+00 | 2.49E+00 | 2.94E+00 | 2.96E+00 | 0.00     |      |
| 26 | D-Alanyl-L-alanyl-poly(glycerophosphate)                                               | C04457      | Other                | 315.0792 | 1.24252  | 194E+08   | 310E+08  | 334E+08   | 366E+08  | 383E+08  | 125E+08   | 129E+08  | 134E+08  | 125E+08  | 135E+08   | -        | - | 1.84E+00 | 2.35E+00 | 2.50E+00 |          |          |          |      |
